# Supplementary material for: Functional regeneration and repair of tendons using biomimetic scaffolds loaded with recombinant periostin
Source: PubMed Central journal article supplement (PMC7910464; doi:10.1038/s41467-021-21545-1), 2021-02-26
Supplement: 41467_2021_21545_MOESM2_ESM.pdf [file 41467_2021_21545_MOESM2_ESM.pdf]

## Description of Additional Supplementary Files

### **Title: Supplementary Video 1**

**Description:** Videos of rat movement in the Defect and ACP-rP groups.
